# Supplementary material
Source: publisher site journal article supplement (https://www.kjim.org/upload/media/kjim-2023-357-Supplementary-Fig-3.pdf)

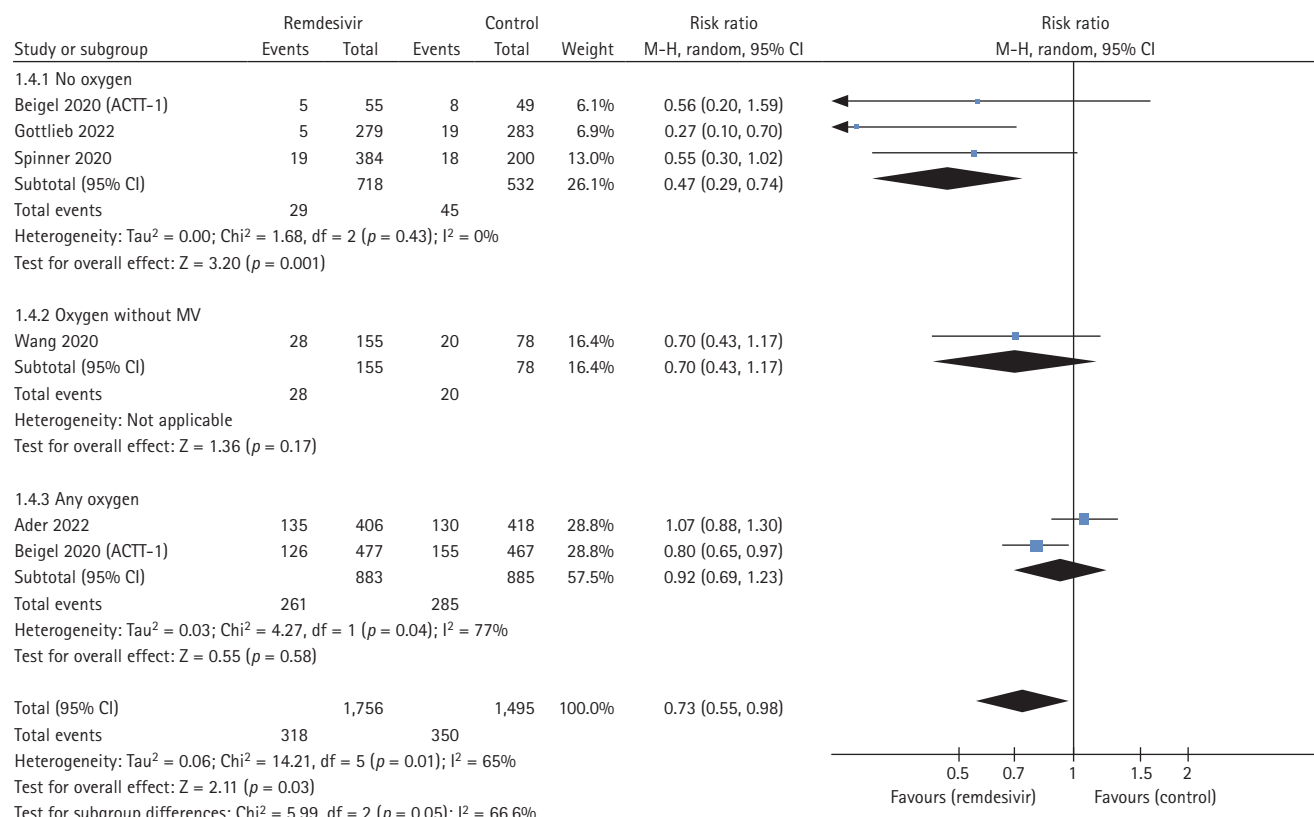

**Supplementary Figure 3.** Forest plot of serious adverse events.

Supplement: Supplementary file 1 [file kjim-2023-357-Supplementary-Fig-3.pdf]
